# Supplementary material
Source: ML conference proceedings conference paper supplement (https://openaccess.thecvf.com/content/WACV2024/html/Inkawhich_Tunable_Hybrid_Proposal_WACV_2024_paper.html)
Supplement: Supplementary file 1 [file Inkawhich_Tunable_Hybrid_Proposal_WACV_2024_supplemental.pdf]

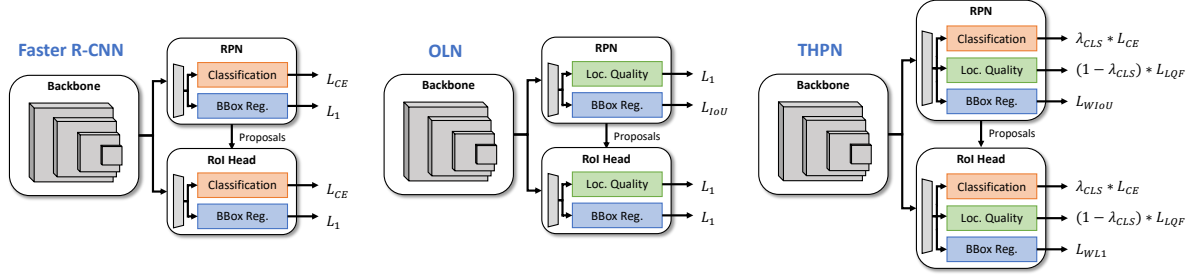

Figure 5. Differences between Faster R-CNN, OLN, and our hybrid THPN architecture.

## Appendix

### A. Overview of baseline methods

There are currently three types of object proposals methods: (1) learning-free approaches, (2) classification-based learning approaches, and (3) pure localization-based learning approaches. In this section, we outline the methodology for each and discuss their respective drawbacks. See Fig. 5 for a visual representation of the architectural differences between our approach and existing proposal networks.

**Learning-free approaches.** Early approaches for generating object proposals rely on hand-crafted features such as contrast and edges. Krähenbühl and Koltun [34] identify critical level sets in geodesic distance transforms computed over carefully placed seeds to generate proposals. Uijlings et al. [60] propose Selective Search, an algorithm that performs a graph-based segmentation and greedily merges superpixels based on color, texture, size, and shape similarity. Edge Boxes [75] is a box proposal algorithm that works by efficiently computing and finding enclosed edge contours in an image. Finally, Multiscale Combinatorial Grouping (MCG) [50] performs multi-scale segmentation and groups regions by efficiently exploring their combinatorial space. These methods were once the backbone of many early object detection systems such as Fast R-CNN [16], but have since been outclassed by learning-based approaches in terms of efficiency and recall performance.

**Classification-based learning approaches.** The seminal learning-based proposal solution is the Region Proposal Network (RPN) [51]. For a predefined set of anchor boxes, RPN learns to predict box coordinate regression deltas as well as an “objectness” score which indicates the likelihood that the box contains a foreground object of interest as opposed to background or an object from a class outside of the training distribution. While the single-stage RPN serves as an efficient benchmark solution for many state-of-the-art detection systems [6, 21, 51], we primarily focus on two-stage approaches in this work as they have been shown to have significantly better generalization abilities [29, 32, 64]. Thus, we consider a class-agnostic Faster R-CNN model as a stronger baseline, in which all annotations are treated as instances of the same class. The loss function for both stages of a class agnostic Faster R-CNN model (i.e., RPN and RoI Head) for an image is defined as:

$$L_{RPN}(\{c_i\}, \{t_i\}) = \frac{1}{N_{cls}} \sum_i L_{BCE}(c_i, c_i^*) + \lambda \frac{1}{N_{reg}} \sum_i c_i^* L_1(t_i, t_i^*). \quad (4)$$

Here,  $i$  is the anchor index,  $c_i$  is the predicted probability of anchor  $i$  containing an object, and  $t_i$  are the predicted box regression deltas for anchor  $i$ . The ground truth labels for objectness and box regression are shown as  $c_i^*$  and  $t_i^*$ , respectively. The box regression head is trained with an  $L_1$  loss. The objectness head of RPN is trained with a binary cross-entropy loss  $L_{BCE}$ , and a sampler is used to ensure 50% of boxes sampled during training are positive matches to some ground truth object.

Kim et al. [32] point out that framing object proposal as a discriminative task hinders generalization as it involves indiscriminate sampling of negative regions when training the objectness head(s). In other words, because we only have access to labels from a subset of object classes that exist in the world, the model overfits to the labeled object classes and treats all unlabeled objects as background.

**Pure localization-based learning approach.** Object Localization Network (OLN) [32] provides an alternative to classification-based approaches in an effort to resolve the aforementioned overfitting issue. OLN uses the same architecture

as Faster R-CNN, but it replaces the classification heads with localization quality prediction heads. OLN uses centerness [59] and IoU score [28] as substitutes for objectness in the OLN-RPN and OLN-Box stages, respectively. Thus, OLN is a pure localization-based proposal network trained with the following loss function:

$$L_{OLN}(\{q_j\}, \{t_i\}) = \frac{1}{N_{lq}} \sum_j L_1(q_j, q_j^*) + \lambda \frac{1}{N_{reg}} \sum_i L_1(t_i, t_i^*). \quad (5)$$

Here,  $q_j$  and  $q_j^*$  are the predicted and target localization quality scores, respectively. Note that we use a separate index  $j$  because the set of sampled anchors for the  $LQ$  head can be different than the set of sampled anchors for the  $BOX$  head. Because we are not training a discriminative classification task, we only need to sample positively matched anchors to train the  $LQ$  head. Intuitively, if a model can accurately predict its overlap  $q_j \in [0, 1]$  with a ground truth object, we can effectively treat  $q_j$  as a notion of objectness. This re-framing of the sparse classification problem allows the model to be less biased towards the specific classes that it is trained on.

While OLN resolves the explicit bias resulting from learning to classify all unlabeled regions as background, we posit that it still suffers from implicit bias because it still only learns from ID instances. Adding to the bias problem is the fact that there exists a natural class imbalance issue in natural data. While OLN’s generalization benefits over Faster R-CNN is shown to be significant when it is trained on a diverse and representative class set such as PASCAL VOC [12], we hypothesize that it will struggle when faced with more challenging tasks with fewer ID classes and fewer labeled instances.

## B. Learning-free baseline comparison

| Method                                          | ALL         |             |
|-------------------------------------------------|-------------|-------------|
|                                                 | AR10        | AR100       |
| Geodesic [34]                                   | 4.0         | 18.0        |
| Sel. Search [60]                                | 5.2         | 16.3        |
| EdgeBoxes [75]                                  | 7.4         | 17.8        |
| MCG [50]                                        | 10.1        | 24.6        |
| <b>THPN (<math>\lambda_{CLS} = 0.50</math>)</b> | <b>41.0</b> | <b>59.9</b> |

Table 6. ALL recall comparison with learning-free baselines on the COCO dataset. The THPN (trained on all COCO classes) significantly outperforms these approaches. Results for baselines are borrowed from [49].

While learning-free approaches to object proposal have been largely supplanted by deep learning-based methods, we feel that they are still worth comparing against. For this test, we compare recall on all classes in the COCO validation set. For this experiment, we use a THPN with  $\lambda_{CLS} = 0.50$  to promote the optimal ID recall. Tab. 6 shows that THPN outclasses all learning-free baselines by a significant margin.

## C. Closed-set performance

THPN’s design is primarily suited for handling open-set tasks that assume the presence of OOD objects of interest. However, we notice that a THPN with a larger  $\lambda_{CLS}$  is capable of superior ID performance to pure classification-based models like Faster R-CNN. For completeness, we test our model’s performance in closed-set tasks. The results of this test are in Tab. 7. We train each model on all classes of COCO or ShipRSImageNet (except *docks*) and test on the complete validation sets. Note that we do not use self-training or crop & zoom augmentations here to test the impact of the architectural differences only. On the large-scale COCO dataset, Faster R-CNN outperforms OLN. However, THPN with  $\lambda_{CLS} \geq 0.10$  beats both baselines. Setting  $\lambda_{CLS} = 0.50$  is the best in this case, beating Faster R-CNN by +2.4 AUC. On the smaller ships data, OLN is superior to Faster R-CNN, and THPN with  $\lambda_{CLS} \leq 0.25$  outperforms OLN by +0.8 AUC.

## D. Data augmentation and training schedule

Tab. 8 shows the effect of various data augmentations and training schedules on an OLN model trained on the VOC split. In this work, we borrow transform implementations from mmdetection [7]. We find that the crop & zoom augmentation is the most effective for improving OOD generalization of an OLN-style of proposal network. However, all augmentations come at a slight cost of ID recall. We also find that using a 2x training schedule (16 epochs) is beneficial only if using the additional strong augmentations.

| Dataset                      | Model                                           | Images | Instances | Test ALL    |             |             |             |
|------------------------------|-------------------------------------------------|--------|-----------|-------------|-------------|-------------|-------------|
|                              |                                                 |        |           | AUC         | AR10        | AR100       | AR1000      |
| COCO                         | Faster R-CNN                                    | 117k   | 860k      | 42.9        | 38.1        | 57.1        | 63.1        |
|                              | OLN                                             | 117k   | 860k      | 39.6        | 29.8        | 54.8        | 64.4        |
|                              | THPN ( $\lambda_{CLS} = 0$ )                    | 117k   | 860k      | 39.6        | 29.8        | 54.8        | 64.4        |
|                              | THPN ( $\lambda_{CLS} = 0.10$ )                 | 117k   | 860k      | 43.1        | 37.4        | 57.5        | 65.0        |
|                              | THPN ( $\lambda_{CLS} = 0.25$ )                 | 117k   | 860k      | 44.7        | 40.4        | 59.1        | 65.6        |
|                              | <b>THPN (<math>\lambda_{CLS} = 0.50</math>)</b> | 117k   | 860k      | <b>45.3</b> | <b>41.0</b> | <b>59.9</b> | <b>66.2</b> |
|                              | THPN ( $\lambda_{CLS} = 0.75$ )                 | 117k   | 860k      | 45.1        | 40.6        | 59.7        | 66.2        |
|                              | THPN ( $\lambda_{CLS} = 0.90$ )                 | 117k   | 860k      | 44.8        | 40.1        | 59.3        | 66.2        |
| THPN ( $\lambda_{CLS} = 1$ ) | 117k                                            | 860k   | 44.7      | 39.9        | 59.2        | 66.0        |             |
| Ships                        | Faster R-CNN                                    | 2.2k   | 10k       | 50.2        | 51.5        | 63.1        | 68.4        |
|                              | OLN                                             | 2.2k   | 10k       | 51.4        | 51.5        | 65.7        | 70.3        |
|                              | THPN ( $\lambda_{CLS} = 0$ )                    | 2.2k   | 10k       | 51.6        | 51.7        | <b>66.0</b> | <b>70.3</b> |
|                              | THPN ( $\lambda_{CLS} = 0.10$ )                 | 2.2k   | 10k       | 51.6        | 52.7        | 65.6        | 69.6        |
|                              | <b>THPN (<math>\lambda_{CLS} = 0.25</math>)</b> | 2.2k   | 10k       | <b>51.8</b> | <b>53.1</b> | 65.8        | 69.7        |
|                              | THPN ( $\lambda_{CLS} = 0.50$ )                 | 2.2k   | 10k       | 51.1        | 52.6        | 64.6        | 68.9        |
|                              | THPN ( $\lambda_{CLS} = 0.75$ )                 | 2.2k   | 10k       | 51.4        | 52.8        | 65.2        | 69.4        |
|                              | THPN ( $\lambda_{CLS} = 0.90$ )                 | 2.2k   | 10k       | 50.9        | 52.4        | 64.3        | 69.3        |
| THPN ( $\lambda_{CLS} = 1$ ) | 2.2k                                            | 10k    | 51.0      | 52.3        | 64.9        | 68.8        |             |

Table 7. Results on closed-set tasks. Here, we assume all instances of all classes of interest are labeled.

| Augmentation                         | Epochs | OOD-AUC     | ID-AUC      | ALL-AUC     |
|--------------------------------------|--------|-------------|-------------|-------------|
| None                                 | 8      | 24.8        | <b>44.8</b> | 35.5        |
| Crop & Zoom                          | 8      | 25.5        | 43.0        | 34.8        |
| Discrete Rotate                      | 8      | 24.8        | 40.3        | 33.0        |
| Random Affine                        | 8      | 23.5        | 42.3        | 33.6        |
| Photometric Distortion               | 8      | 25.0        | 44.4        | 35.4        |
| Crop & Zoom + Photometric Distortion | 8      | 25.5        | 42.0        | 34.2        |
| None                                 | 16     | 24.8        | 44.8        | 35.5        |
| Crop & Zoom                          | 16     | <b>26.1</b> | 44.2        | <b>35.8</b> |
| Discrete Rotate                      | 16     | 25.4        | 41.8        | 34.0        |
| Random Affine                        | 16     | 24.0        | 43.7        | 34.5        |
| Crop & Zoom + Photometric Distortion | 16     | 26.0        | 43.7        | 35.4        |

Table 8. Effect of augmentation and training schedule on an OLN model trained on the VOC split.

| Split    | Model                                        | Images / Instances | OOD         |             |             |             | ID          |             |             |             | ALL         |             |             |             |
|----------|----------------------------------------------|--------------------|-------------|-------------|-------------|-------------|-------------|-------------|-------------|-------------|-------------|-------------|-------------|-------------|
|          |                                              |                    | AUC         | AR10        | AR100       | AR1k        | AUC         | AR10        | AR100       | AR1k        | AUC         | AR10        | AR100       | AR1k        |
| Military | Faster R-CNN                                 | 1.5k / 4.7k        | 11.8        | 11.8        | 12.2        | 24.3        | 65.6        | 75.6        | 79.4        | 81.3        | 33.3        | 37.1        | 39.1        | 47.1        |
|          | OLN                                          | 1.5k / 4.7k        | 23.0        | 23.4        | 28.1        | 35.8        | 69.0        | 79.2        | 84.4        | 85.4        | 41.3        | 45.2        | 50.6        | 55.6        |
|          | <b>THPN (<math>\lambda_{CLS} = 0</math>)</b> | 1.5k / 6.1k        | <b>29.0</b> | <b>28.4</b> | <b>37.1</b> | <b>40.7</b> | 68.8        | 78.3        | 84.2        | 85.1        | <b>44.7</b> | <b>47.7</b> | <b>56.0</b> | <b>58.5</b> |
|          | THPN ( $\lambda_{CLS} = 0.10$ )              | 1.5k / 6.1k        | 26.6        | 27.0        | 33.6        | 37.8        | <b>69.3</b> | <b>79.4</b> | <b>84.7</b> | <b>85.4</b> | 43.6        | 47.5        | 54.1        | 56.9        |
|          | THPN ( $\lambda_{CLS} = 0.25$ )              | 1.5k / 6.1k        | 22.4        | 23.1        | 27.3        | 33.8        | 69.0        | 79.3        | 84.1        | 84.9        | 40.9        | 45.2        | 50.0        | 54.3        |
|          | THPN ( $\lambda_{CLS} = 0.50$ )              | 1.5k / 6.1k        | 16.1        | 16.8        | 19.2        | 25.8        | 68.3        | 78.7        | 83.1        | 84.4        | 36.9        | 41.3        | 44.7        | 49.2        |
| Civilian | Faster R-CNN                                 | 1.0k / 4.4k        | 16.0        | 16.8        | 17.8        | 29.1        | 33.4        | 29.5        | 44.3        | 51.2        | 24.6        | 22.6        | 31.0        | 40.1        |
|          | OLN                                          | 1.0k / 4.4k        | 38.7        | 38.4        | 49.2        | 56.6        | 35.6        | 30.7        | 47.9        | 54.3        | 36.9        | 33.8        | 48.5        | 55.5        |
|          | <b>THPN (<math>\lambda_{CLS} = 0</math>)</b> | 1.0k / 5.7k        | <b>49.8</b> | <b>50.4</b> | <b>63.5</b> | <b>68.3</b> | <b>36.5</b> | 30.3        | <b>49.1</b> | <b>56.7</b> | <b>42.8</b> | <b>39.3</b> | <b>56.2</b> | <b>62.5</b> |
|          | THPN ( $\lambda_{CLS} = 0.10$ )              | 1.0k / 5.7k        | 46.3        | 47.2        | 58.4        | 64.2        | 36.4        | 31.4        | 48.5        | 55.0        | 41.0        | 38.2        | 53.4        | 59.6        |
|          | THPN ( $\lambda_{CLS} = 0.25$ )              | 1.0k / 5.7k        | 33.9        | 34.4        | 41.6        | 52.5        | 35.8        | <b>31.5</b> | 47.6        | 54.0        | 34.6        | 32.0        | 44.5        | 53.3        |
|          | THPN ( $\lambda_{CLS} = 0.50$ )              | 1.0k / 5.7k        | 24.1        | 22.8        | 28.7        | 42.8        | 35.5        | 31.1        | 46.9        | 54.1        | 29.5        | 26.2        | 37.7        | 48.5        |

Table 9. Full results on the *ships* challenge.

## E. Full ship detection results

For the purposes of space efficiency, we show a summary of the results from the *ships* challenge in Sec. 5.4 of the main text. In this section, we provide the full results of this experiment in Tab. 9. In both splits, THPN with  $\lambda_{CLS} = 0$  is vastly

| Split                           | Model                                           | Images / Instances | OOD         |             |             |             | ID          |             |             |             | ALL         |             |             |             |
|---------------------------------|-------------------------------------------------|--------------------|-------------|-------------|-------------|-------------|-------------|-------------|-------------|-------------|-------------|-------------|-------------|-------------|
|                                 |                                                 |                    | AUC         | AR10        | AR100       | AR1k        | AUC         | AR10        | AR100       | AR1k        | AUC         | AR10        | AR100       | AR1k        |
| COCO40                          | Faster R-CNN                                    | 104k / 623k        | 26.6        | 17.5        | 36.0        | 51.4        | 44.4        | 41.4        | 58.3        | 63.2        | 39.0        | 33.8        | 51.7        | 60.0        |
|                                 | OLN                                             | 104k / 623k        | 33.1        | 25.8        | 44.8        | 54.6        | 42.1        | 34.6        | 57.2        | 65.0        | 38.9        | 30.5        | 53.3        | 62.2        |
|                                 | THPN ( $\lambda_{CLS} = 0$ )                    | 104k / 810k        | 34.1        | 28.0        | 45.6        | 55.2        | 41.6        | 34.6        | 56.2        | 64.0        | 38.9        | 31.1        | 52.8        | 61.6        |
|                                 | THPN ( $\lambda_{CLS} = 0.10$ )                 | 104k / 810k        | <b>34.8</b> | <b>29.8</b> | <b>46.0</b> | 55.3        | 44.0        | 39.6        | 58.1        | 64.6        | 40.7        | 35.1        | 54.3        | 62.0        |
|                                 | <b>THPN (<math>\lambda_{CLS} = 0.25</math>)</b> | 104k / 810k        | 34.5        | 29.2        | 45.6        | <b>55.4</b> | 45.0        | 41.5        | 59.0        | <b>65.0</b> | <b>41.5</b> | <b>36.5</b> | <b>54.9</b> | <b>62.4</b> |
| THPN ( $\lambda_{CLS} = 0.50$ ) | 104k / 810k                                     | 33.6               | 28.0        | 44.5        | 55.3        | <b>45.1</b> | <b>41.7</b> | <b>60.7</b> | 64.7        | 34.4        | 29.9        | 44.8        | 55.1        |             |
| VOC                             | Faster R-CNN                                    | 95k / 493k         | 19.3        | 11.6        | 25.1        | 42.4        | 46.7        | 45.1        | 60.7        | 64.7        | 34.4        | 29.9        | 44.8        | 55.1        |
|                                 | OLN                                             | 95k / 493k         | 24.8        | 18.4        | 33.2        | 45.0        | 44.8        | 40.1        | 59.3        | 66.1        | 35.5        | 29.1        | 47.5        | 56.9        |
|                                 | THPN ( $\lambda_{CLS} = 0$ )                    | 95k / 641k         | 27.7        | 21.3        | 36.9        | 48.0        | 44.8        | 39.9        | 59.5        | 66.0        | 36.7        | 30.1        | 49.3        | 58.3        |
|                                 | THPN ( $\lambda_{CLS} = 0.10$ )                 | 95k / 641k         | <b>27.9</b> | <b>22.0</b> | <b>37.1</b> | <b>48.0</b> | 46.8        | 44.2        | 60.9        | 66.5        | 38.0        | 32.9        | 50.2        | 58.5        |
|                                 | <b>THPN (<math>\lambda_{CLS} = 0.25</math>)</b> | 95k / 641k         | 27.5        | 21.4        | 36.6        | 48.0        | 47.6        | 45.8        | 61.8        | 66.8        | <b>38.4</b> | <b>33.7</b> | <b>50.5</b> | 58.8        |
| THPN ( $\lambda_{CLS} = 0.50$ ) | 95k / 641k                                      | 26.4               | 19.8        | 35.0        | 47.8        | <b>47.8</b> | <b>46.1</b> | <b>62.1</b> | <b>67.1</b> | 38.0        | 33.5        | 50.0        | <b>58.9</b> |             |
| VOC5                            | Faster R-CNN                                    | 74k / 357k         | 16.3        | 9.8         | 20.7        | 38.1        | 48.1        | 47.6        | 62.2        | 65.6        | 29.1        | 24.8        | 37.4        | 49.6        |
|                                 | OLN                                             | 74k / 357k         | 20.3        | 14.1        | 26.9        | 40.1        | 47.6        | 45.2        | 61.7        | 67.8        | 31.0        | 25.7        | 40.8        | 51.6        |
|                                 | THPN ( $\lambda_{CLS} = 0$ )                    | 74k / 465k         | 23.5        | 17.1        | 31.3        | 43.9        | 46.8        | 43.9        | 61.1        | 67.0        | 32.6        | 26.7        | 43.2        | 53.7        |
|                                 | THPN ( $\lambda_{CLS} = 0.10$ )                 | 74k / 465k         | <b>23.7</b> | <b>17.6</b> | <b>31.5</b> | <b>43.9</b> | 48.3        | 47.1        | 62.4        | 67.4        | 33.3        | 28.4        | 43.8        | 53.7        |
|                                 | <b>THPN (<math>\lambda_{CLS} = 0.25</math>)</b> | 74k / 465k         | 23.6        | 17.4        | 31.1        | 43.9        | 49.0        | 48.4        | 63.1        | 67.7        | <b>33.5</b> | <b>28.9</b> | <b>43.9</b> | <b>53.8</b> |
| THPN ( $\lambda_{CLS} = 0.50$ ) | 74k / 465k                                      | 22.7               | 16.1        | 30.0        | 43.9        | <b>49.3</b> | <b>48.7</b> | <b>63.5</b> | <b>67.8</b> | 33.2        | 28.5        | 43.4        | 53.8        |             |
| Animal                          | Faster R-CNN                                    | 24k / 63k          | 11.5        | 6.0         | 13.5        | 31.3        | 53.9        | 58.9        | 67.1        | 69.4        | 14.6        | 9.8         | 17.5        | 34.1        |
|                                 | OLN                                             | 24k / 63k          | 13.3        | 8.2         | 16.4        | 31.5        | 55.8        | 59.7        | 69.7        | 73.2        | 16.4        | 11.9        | 20.3        | 34.6        |
|                                 | THPN ( $\lambda_{CLS} = 0$ )                    | 24k / 81k          | 16.9        | 9.9         | 22.9        | <b>36.7</b> | 55.5        | 59.0        | 69.7        | 73.0        | 19.7        | 13.4        | 26.3        | 39.3        |
|                                 | THPN ( $\lambda_{CLS} = 0.10$ )                 | 24k / 81k          | <b>17.0</b> | <b>10.4</b> | <b>22.9</b> | 36.6        | 56.1        | 60.6        | 69.9        | 73.0        | 19.8        | 13.9        | 26.3        | 39.3        |
|                                 | <b>THPN (<math>\lambda_{CLS} = 0.25</math>)</b> | 24k / 81k          | 17.0        | 10.3        | 22.8        | 36.6        | 56.6        | 61.5        | 70.5        | 73.2        | <b>19.8</b> | <b>14.0</b> | <b>26.3</b> | <b>39.3</b> |
| THPN ( $\lambda_{CLS} = 0.50$ ) | 24k / 81k                                       | 15.9               | 9.3         | 20.7        | 36.6        | <b>56.8</b> | <b>61.9</b> | <b>70.8</b> | <b>73.3</b> | 18.9        | 13.1        | 24.4        | 39.3        |             |

Table 10. Results on the *training class diversity* challenge when using a THPN trained with  $\lambda_{CLS} = 0.10$ . The listed  $\lambda_{CLS}$  in the table is the value used during inference-time.

| Split                           | Model                                           | Images / Instances | OOD         |             |             |             | ID   |             |             |      | ALL         |             |             |             |
|---------------------------------|-------------------------------------------------|--------------------|-------------|-------------|-------------|-------------|------|-------------|-------------|------|-------------|-------------|-------------|-------------|
|                                 |                                                 |                    | AUC         | AR10        | AR100       | AR1k        | AUC  | AR10        | AR100       | AR1k | AUC         | AR10        | AR100       | AR1k        |
| VOC (50%)                       | Faster R-CNN                                    | 75k / 246k         | 18.7        | 11.7        | 24.1        | 40.9        | 44.8 | 42.7        | 58.5        | 63.1 | 33.1        | 28.5        | 43.2        | 53.6        |
|                                 | OLN                                             | 75k / 246k         | 23.8        | 17.7        | 31.7        | 43.8        | 44.4 | 39.5        | 58.8        | 65.7 | 34.9        | 28.5        | 46.7        | 56.3        |
|                                 | THPN ( $\lambda_{CLS} = 0$ )                    | 75k / 320k         | 25.7        | 19.4        | <b>34.2</b> | <b>45.9</b> | 44.7 | 40.9        | 58.6        | 65.4 | 35.9        | 30.1        | 47.6        | 57.1        |
|                                 | THPN ( $\lambda_{CLS} = 0.10$ )                 | 75k / 320k         | <b>25.7</b> | <b>19.6</b> | 34.0        | 45.9        | 46.1 | 44.1        | 59.7        | 65.7 | 36.7        | 32.0        | 48.1        | 57.2        |
|                                 | <b>THPN (<math>\lambda_{CLS} = 0.25</math>)</b> | 75k / 320k         | 25.1        | 18.5        | 33.3        | 45.8        | 46.8 | <b>45.3</b> | 60.5        | 66.0 | <b>36.9</b> | <b>32.4</b> | <b>48.3</b> | <b>57.4</b> |
| THPN ( $\lambda_{CLS} = 0.50$ ) | 75k / 320k                                      | 23.7               | 16.3        | 31.4        | 45.7        | <b>46.8</b> | 44.9 | <b>60.8</b> | <b>66.2</b> | 36.3 | 31.5        | 47.6        | 57.4        |             |
| VOC (25%)                       | Faster R-CNN                                    | 56k / 123k         | 17.9        | 11.2        | 22.9        | 39.2        | 42.7 | 40.1        | 55.8        | 60.9 | 31.6        | 27.0        | 41.1        | 51.6        |
|                                 | OLN                                             | 56k / 123k         | 21.9        | 16.6        | 28.8        | 40.7        | 43.2 | 38.3        | 57.1        | 64.1 | 33.4        | 27.5        | 44.5        | 54.0        |
|                                 | THPN ( $\lambda_{CLS} = 0$ )                    | 56k / 160k         | <b>24.3</b> | <b>17.9</b> | <b>32.3</b> | <b>44.8</b> | 43.6 | 39.6        | 57.2        | 64.1 | 34.6        | 28.8        | 46.0        | 55.8        |
|                                 | THPN ( $\lambda_{CLS} = 0.10$ )                 | 56k / 160k         | 24.2        | 17.9        | 32.1        | 44.8        | 44.7 | 42.4        | 58.0        | 64.2 | 35.3        | 30.5        | 46.4        | 55.9        |
|                                 | <b>THPN (<math>\lambda_{CLS} = 0.25</math>)</b> | 56k / 160k         | 23.7        | 17.0        | 31.4        | 44.7        | 45.2 | <b>43.3</b> | 58.5        | 64.3 | <b>35.4</b> | <b>30.7</b> | <b>46.4</b> | <b>56.0</b> |
| THPN ( $\lambda_{CLS} = 0.50$ ) | 56k / 160k                                      | 22.6               | 15.2        | 29.9        | 44.6        | <b>45.3</b> | 43.1 | <b>58.8</b> | <b>64.5</b> | 35.0 | 30.0        | 45.8        | 56.0        |             |
| VOC (10%)                       | Faster R-CNN                                    | 33k / 49k          | 16.2        | 10.4        | 20.5        | 35.8        | 39.5 | 36.2        | 51.8        | 57.8 | 29.1        | 24.5        | 37.9        | 48.4        |
|                                 | OLN                                             | 33k / 49k          | 19.8        | 15.2        | 25.7        | 37.3        | 40.8 | 36.3        | 53.6        | 61.0 | 31.3        | 26.0        | 41.3        | 50.8        |
|                                 | THPN ( $\lambda_{CLS} = 0$ )                    | 33k / 64k          | 22.9        | 16.9        | <b>30.3</b> | <b>42.4</b> | 41.5 | 37.3        | 54.5        | 61.8 | 33.0        | 27.2        | 43.7        | 53.5        |
|                                 | THPN ( $\lambda_{CLS} = 0.10$ )                 | 33k / 64k          | <b>23.0</b> | <b>17.2</b> | 30.2        | 42.4        | 42.3 | 39.5        | 55.0        | 61.9 | 33.5        | 28.6        | 43.9        | 53.6        |
|                                 | <b>THPN (<math>\lambda_{CLS} = 0.25</math>)</b> | 33k / 64k          | 22.6        | 16.4        | 29.9        | 42.4        | 42.8 | <b>40.4</b> | 55.5        | 62.1 | <b>33.6</b> | <b>28.9</b> | <b>44.1</b> | 53.7        |
| THPN ( $\lambda_{CLS} = 0.50$ ) | 33k / 64k                                       | 21.9               | 15.0        | 29.1        | 42.5        | <b>43.0</b> | 40.3 | <b>55.9</b> | <b>62.2</b> | 33.4 | 28.4        | 44.0        | <b>53.8</b> |             |

Table 11. Results on the *semi-supervised* challenge when using a THPN trained with  $\lambda_{CLS} = 0.10$ . The listed  $\lambda_{CLS}$  in the table is the value used during inference-time.

superior to the baselines in terms of OOD recall (regardless of  $k$  in  $AR@k$ ). Because OLN also effectively has  $\lambda_{CLS} = 0$ , it is clear that our self-training procedure is very effective in this domain. This is likely due to the fact that there are relatively few labeled training instances compared to COCO. Given the correct setting of  $\lambda_{CLS}$ , THPN can also slightly improve the ID recall on both splits.

## F. Inference-time dynamic $\lambda_{CLS}$

In all other experiments, the  $\lambda_{CLS}$  associated with the THPN models is consistent during both training (i.e., loss weighting and score weighting during pseudo-label generation) and inference (score weighting). For the sake of completeness, we include results where we use one  $\lambda_{CLS}$  for training, and alter it during inference. This implementation of THPN makes the model truly inference-time dynamic. We evaluate on the *training class diversity* and *semi-supervised* challenges using  $\lambda_{CLS} = 0.10$  during training. The results of these experiments are in Table 10 and Table 11, respectively. Overall, we find that this inference-time-dynamic variant is capable of approaching the performance of the static-trained variant in terms of

ALL recall. However, it achieves this by creating a more optimal balance between OOD recall and ID recall, rather than improving either one individually. The dynamic variants have much less deviation in performance between  $\lambda_{CLS}$  values. Interestingly, the most optimal setting (in terms of ALL recall) for a dynamic THPN using  $\lambda_{CLS} = 0.10$  during training is to use  $\lambda_{CLS} = 0.25$  during inference. Regardless, these experiments confirm that THPN can be treated as dynamic at inference-time to good effect.

### G. Pseudo-label visualizations

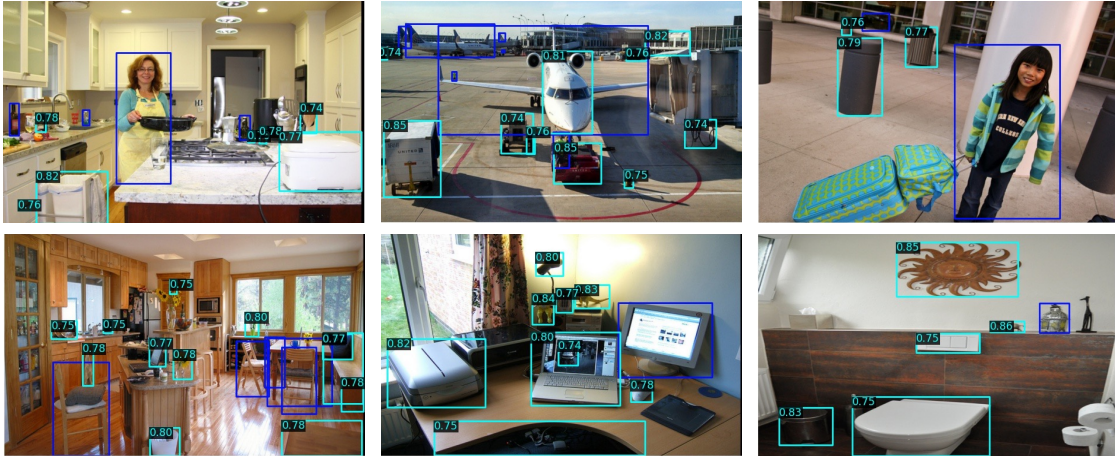

Figure 6. Visualization of pseudo-label boxes (cyan) alongside the original ground truth boxes (blue) on various training images. Here, we consider the VOC split and the pseudo-labels are from a THPN ( $\lambda_{CLS} = 0.10$ ) model with  $p=30\%$ .

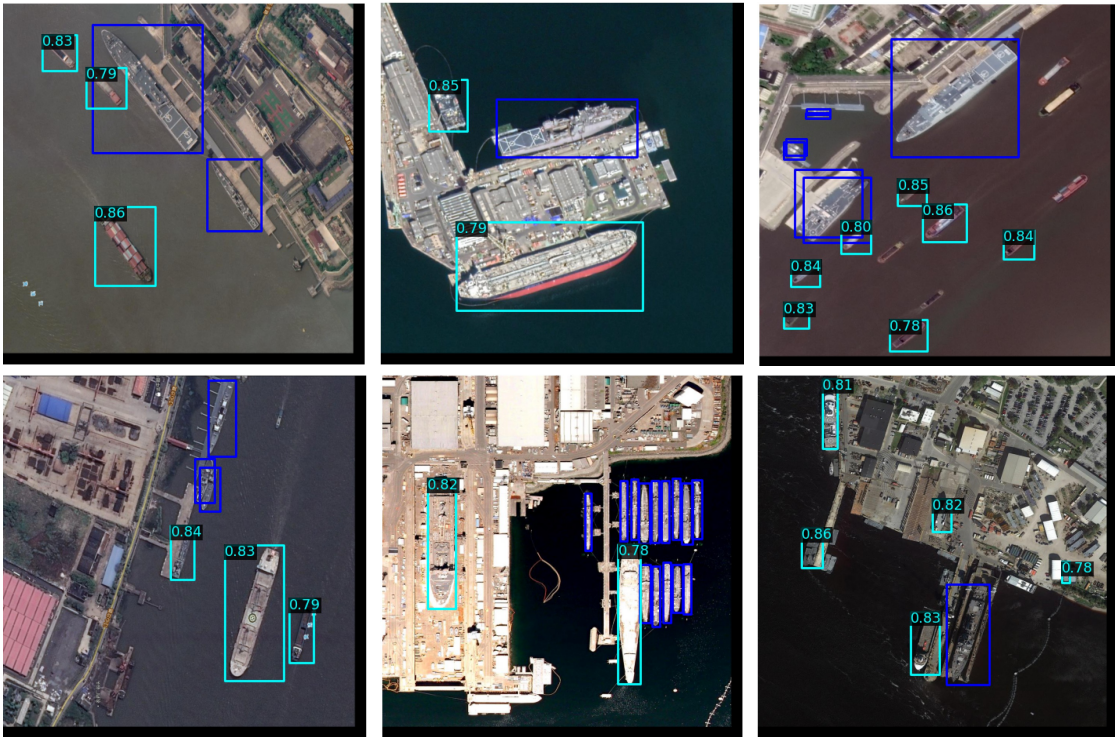

Figure 7. Visualization of pseudo-label boxes (cyan) alongside the original ground truth boxes (blue) on various training images. Here, we consider the Warship split and the pseudo-labels are from a THPN ( $\lambda_{CLS} = 0$ ) model with  $p=30\%$ .

## H. Prediction visualizations

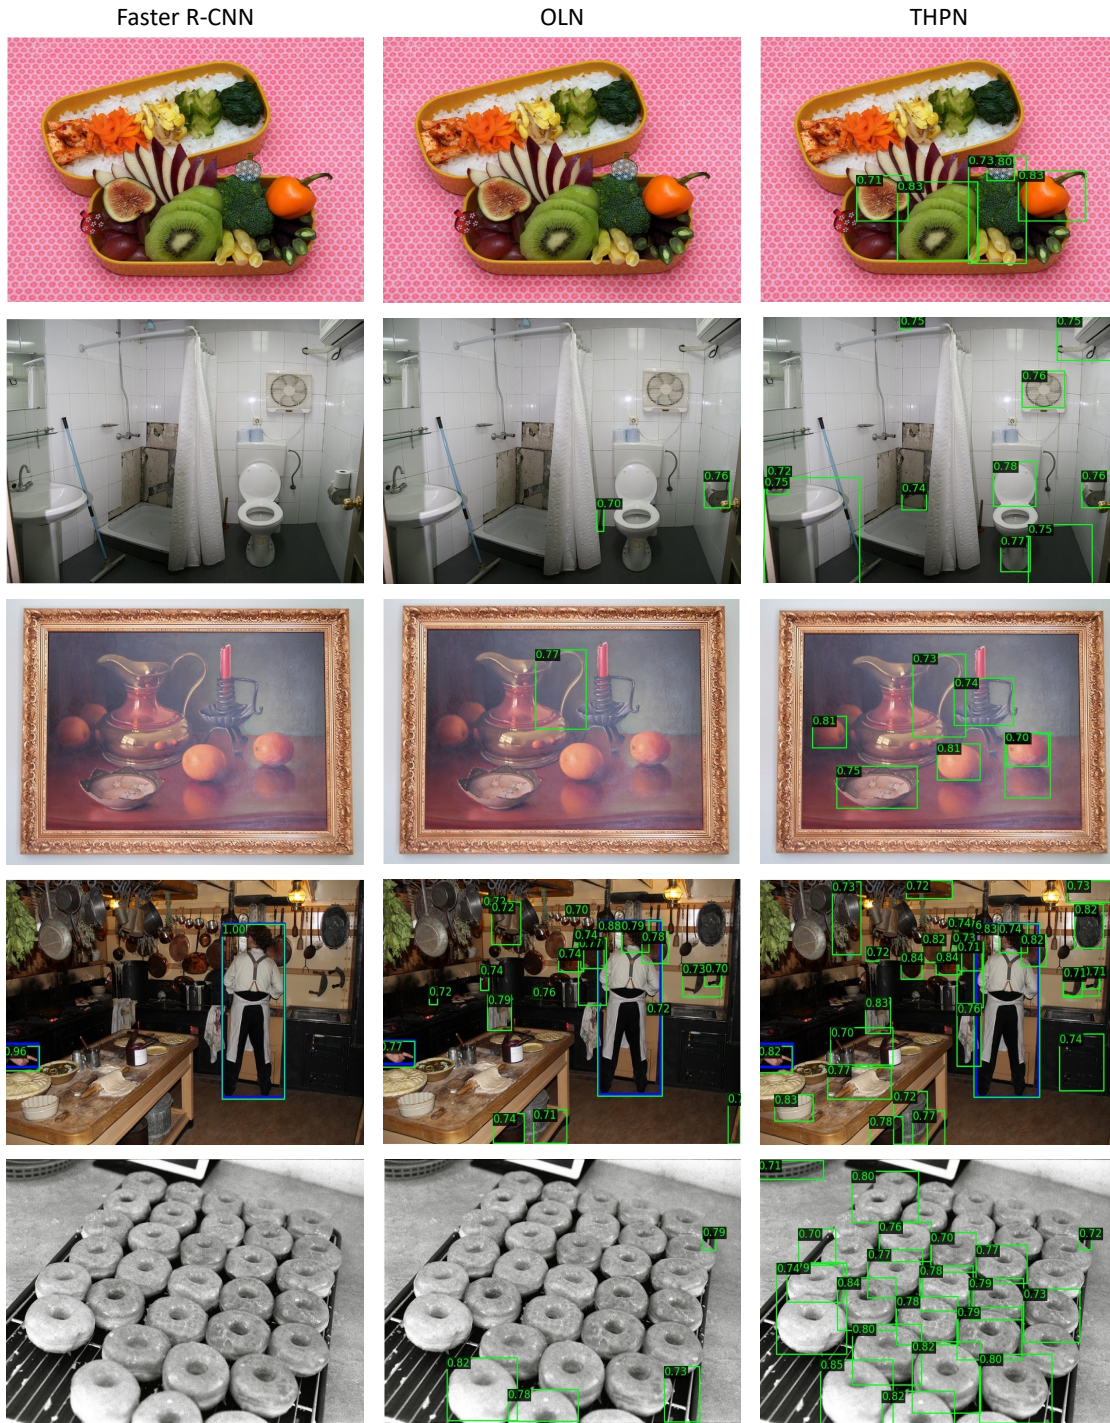

Figure 8. Visualization of predicted proposals (green) alongside the ground truth boxes (blue) on various COCO validation images. All models are trained on the VOC5 split (THPN is trained with  $\lambda_{CLS} = 0$ ). In general, THPN is able to detect many OOD objects that Faster R-CNN and OLN misses. We find that a common failure mode of localization-based models is proposing parts of a larger object (e.g., a person’s hand, the leg of a chair, etc.).

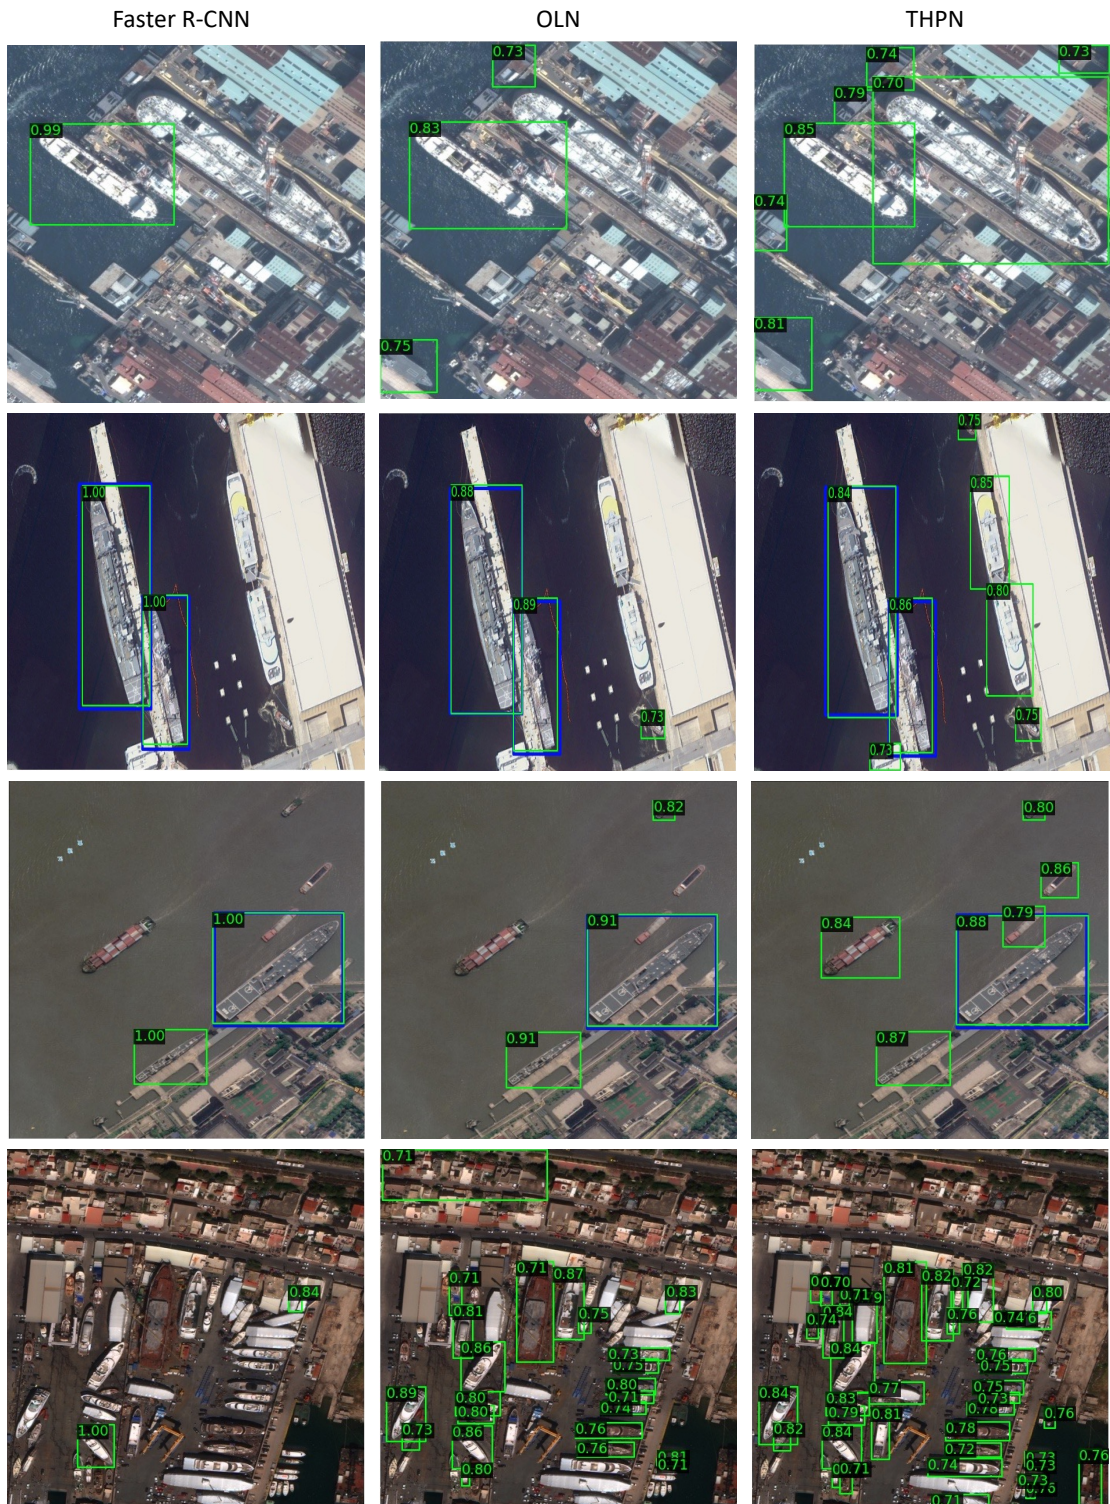

Figure 9. Visualization of predicted proposals (green) alongside the ground truth boxes (blue) on various ShipRSImageNet validation images. All models are trained on the Military split (THPN is trained with  $\lambda_{CLS} = 0$ ). In general, THPN is able to detect many more OOD ships than Faster R-CNN and OLN while maintaining performance on the ID military ships. We find that a common failure mode of THPN on this dataset is to localize large defined objects on shore (e.g., storage containers, docks, etc.).

## I. Training class diversity challenge splits

| COCO Class     | Super Category | COCO40 | VOC  | VOC5 | Animal |
|----------------|----------------|--------|------|------|--------|
| person         | person         | ✓      | ✓    | ✓    |        |
| bicycle        | vehicle        | ✓      | ✓    | ✓    |        |
| car            | vehicle        | ✓      | ✓    |      |        |
| motorcycle     | vehicle        | ✓      | ✓    |      |        |
| airplane       | vehicle        | ✓      | ✓    |      |        |
| bus            | vehicle        | ✓      | ✓    |      |        |
| train          | vehicle        | ✓      | ✓    |      |        |
| truck          | vehicle        |        |      |      |        |
| boat           | vehicle        | ✓      | ✓    |      |        |
| traffic light  | outdoor        | ✓      |      |      |        |
| fire hydrant   | outdoor        |        |      |      |        |
| stop sign      | outdoor        | ✓      |      |      |        |
| parking meter  | outdoor        |        |      |      |        |
| bench          | outdoor        | ✓      |      |      |        |
| bird           | animal         | ✓      | ✓    |      | ✓      |
| cat            | animal         | ✓      | ✓    |      | ✓      |
| dog            | animal         | ✓      | ✓    | ✓    | ✓      |
| horse          | animal         | ✓      | ✓    |      | ✓      |
| sheep          | animal         | ✓      | ✓    |      | ✓      |
| cow            | animal         | ✓      | ✓    |      | ✓      |
| elephant       | animal         |        |      |      | ✓      |
| bear           | animal         |        |      |      | ✓      |
| zebra          | animal         |        |      |      | ✓      |
| giraffe        | animal         |        |      |      | ✓      |
| backpack       | accessory      | ✓      |      |      |        |
| umbrella       | accessory      |        |      |      |        |
| handbag        | accessory      | ✓      |      |      |        |
| tie            | accessory      |        |      |      |        |
| suitcase       | accessory      |        |      |      |        |
| frisbee        | sports         |        |      |      |        |
| skis           | sports         | ✓      |      |      |        |
| snowboard      | sports         |        |      |      |        |
| sports ball    | sports         | ✓      |      |      |        |
| kite           | sports         |        |      |      |        |
| baseball bat   | sports         |        |      |      |        |
| baseball glove | sports         |        |      |      |        |
| skateboard     | sports         | ✓      |      |      |        |
| surfboard      | sports         | ✓      |      |      |        |
| tennis racket  | sports         |        |      |      |        |
| bottle         | kitchen        | ✓      | ✓    |      |        |
| wine glass     | kitchen        |        |      |      |        |
| cup            | kitchen        |        |      |      |        |
| fork           | kitchen        | ✓      |      |      |        |
| knife          | kitchen        |        |      |      |        |
| spoon          | kitchen        |        |      |      |        |
| bowl           | kitchen        | ✓      |      |      |        |
| banana         | food           |        |      |      |        |
| apple          | food           | ✓      |      |      |        |
| sandwich       | food           |        |      |      |        |
| orange         | food           |        |      |      |        |
| broccoli       | food           |        |      |      |        |
| carrot         | food           |        |      |      |        |
| hot dog        | food           |        |      |      |        |
| pizza          | food           | ✓      |      |      |        |
| donut          | food           |        |      |      |        |
| cake           | food           |        |      |      |        |
| chair          | furniture      | ✓      | ✓    | ✓    |        |
| couch          | furniture      | ✓      | ✓    |      |        |
| potted plant   | furniture      | ✓      | ✓    |      |        |
| bed            | furniture      |        |      |      |        |
| dining table   | furniture      | ✓      | ✓    |      |        |
| toilet         | furniture      | ✓      |      |      |        |
| tv             | electronic     | ✓      | ✓    |      |        |
| laptop         | electronic     | ✓      |      |      |        |
| mouse          | electronic     |        |      |      |        |
| remote         | electronic     | ✓      |      |      |        |
| keyboard       | electronic     |        |      |      |        |
| cell phone     | electronic     |        |      |      |        |
| microwave      | appliance      |        |      |      |        |
| oven           | appliance      | ✓      |      |      |        |
| toaster        | appliance      |        |      |      |        |
| sink           | appliance      | ✓      |      |      |        |
| refrigerator   | appliance      | ✓      |      |      |        |
| book           | indoor         |        |      |      |        |
| clock          | indoor         |        |      |      |        |
| vase           | indoor         |        |      |      |        |
| scissors       | indoor         |        |      |      |        |
| teddy bear     | indoor         |        |      |      |        |
| hair drier     | indoor         |        |      |      |        |
| toothbrush     | indoor         | ✓      |      |      |        |
| % Train Set    |                | 72.5   | 57.3 | 41.6 | 7.3    |
| % Test Set     |                | 72.2   | 57.0 | 41.5 | 7.3    |

Table 12. Training splits for the *training class diversity* challenge.



## J. Frequently Asked Questions (FAQ)

- Why do we call this method “for the Open World”?
  - According to the terminology in the literature, “open-set recognition” refers to the task of dealing with OOD inputs [55], while “open-world recognition” refers to the task of detecting OOD inputs and incrementally learning them. In this work, we follow existing related work [32, 54] and refer to “open-world” more generally as any setting or environment that contains OOD instances in the test set. Importantly, THPN would be very useful to incorporate into both open-set object detection models *and* open-world object detection models.
- Why do we not measure Average Precision?
  - Computing precision for any class of object involves finding false positive predictions. In the case of class-agnostic open-set object detection, while we have labels for some of the OOD objects in the test images (e.g., the non-VOC COCO classes), this does not encapsulate *all* OOD objects in the test images. For example, “snowmobile” is not a COCO class, however there exists images with snowmobile instances in the validation set. It would be unfair to mark an accurate detection of an unlabeled snowmobile instance as a false positive. Therefore, we only consider recall. This is common practice in this field of study [32, 33, 54]. Furthermore, a proposal network’s job is to maximize recall on all objects. In a full object detection model, there is a second stage which makes the final prediction refinement (e.g., R-CNN classification head).
- How is AR-AUC computed?
  - The most common metric for performance for proposal networks is Average Recall @ k detections per image (AR@k). The most common operating point to consider is AR@100, meaning the average recall when allowing 100 predictions per image. However, for some applications we may care about other operating points (e.g., k=10, k=1000, etc.). Therefore, a reasonable summary statistic to use is AUC introduced by Kim et al. [32] which computes the area under the curve of AR@k for k={10, 30, 50, 100, 300, 500, 1000}.
- Does THPN’s self-training require additional data that the baselines do not have access to?
  - As mentioned in Section 5, during training, not only do we assume access to *only* ID labels of the ID classes in the training set, we also ensure that THPN is only ever exposed to images that contain at least one ID label during training and pseudo-label generation. Thus, our implementation of THPN does not use any unlabeled training images, just like any non-self-trained baseline. While our implementation of THPN does not use auxiliary images for self-training for the sake of fairness, it is certainly possible to do so. This can be seen as an additional degree of flexibility of our method (as self-training can seamlessly ingest unlabeled data). We save investigating this for future work.
- Why is classification-based objectness beneficial for ID detection and localization-based objectness beneficial for OOD detection?
  - Due to space constraints, we could not include all details about classification-based objectness and localization-based objectness in the main paper. However, we detail these methods in Appendix A. Essentially, the difference in behavior comes down to the fact that classification-based models rely on discriminative learning which forces the model to sample negative regions that do not contain an ID object. The problem is, these negative regions often contain OOD objects. Therefore, a classification-based model explicitly treats OOD objects as *background*, meaning they are not detected during inference. Localization-based models instead frame objectness as the localization quality (e.g., centerness [59] or IoU [28]) between a given region and any ground truth box. Critically, learning localization-quality is not discriminative, so it does not require explicitly sampling negative regions. Thus, this approach is inherently more likely to generalize to OOD objects [32]. However, what is not shown in the OLN paper [32] is the fact that this improved OOD recall comes at the cost of reduced ID recall. Our solution (THPN) offers a tunable, flexible model that can achieve the best of both worlds by learning and using both objectness representations with a weight  $\lambda_{CLS}$ .
- Why do we not compare THPN to Open World Object Detection (OWOD) methods?

- While it may seem reasonable to compare THPN to the increasing number of OWOD models in the literature [19, 29, 66, 70, 74], these models are for two very different tasks. OWOD models are full detection models that attempt to incrementally learn novel classes using a human-in-the-loop. THPN, on the other hand, is a class-agnostic proposal network. While THPN has the potential to greatly enhance the novel object detection capabilities as a component any OWOD model (i.e., by replacing RPN with THPN), we feel this investigation is beyond the scope of this paper, so we save it for future work.
- Can THPN made to be dynamic at inference time instead of only tunable at training time?
  - In our implementation of THPN, we assume that the  $\lambda_{CLS}$  used during training is the same  $\lambda_{CLS}$  used during inference. In this way, THPN is not necessarily meant to be tunable post-training. However, we also investigate what happens when we train with a moderate  $\lambda_{CLS} = 0.10$ , and modulate  $\lambda_{CLS}$  during inference. Results from this are in Appendix F. Overall, we find that while the results are not quite as good as when we modulate  $\lambda_{CLS}$  during training, an inference-time-dynamic variant of THPN is still quite effective. Either variant outperforms all baselines.
- What are the potential negative societal impacts?
  - Powerful object detection algorithms enable a huge range of potential automated applications. While many of these are righteous technologies (e.g., autonomous vehicles, more effective search and rescue, robots for the disabled, etc.), there are of course several nefarious applications such as aggressive surveillance or weapon systems. Regardless, due to the ubiquity of these models in the public domain, we argue that making these models as robust and trustworthy as possible is overall a noble and important endeavor.
